# Supplementary material for: Detecting Brachypodium distachyon Chromosomes Bd4 and Bd5 in MH- and X-Ray-Induced Micronuclei Using mcFISH
Source: MDPI journal article supplement (doi:10.3390/ijms20112848), 2019-06-11
Supplement: s1 [file s1]

TABLE S4. Detailed statistical analyses related to the data presented in Figure 6. Values are means $\pm$ standard error ( $n = 3$ ). Means followed by the same letter (a, b, c) are not significantly different from each other basing on the parametric analysis of variance and *post hoc* LSD test ( $p < 0.05$ ).

|           |                    |
|-----------|--------------------|
| MH Type 1 | 86.00 $\pm$ 1.73 a |
| MH Type 2 | 6.00 $\pm$ 0.58 b  |
| MH Type 3 | 6.00 $\pm$ 1.00 b  |
| MH Type 4 | 1.00 $\pm$ 0.58 c  |
| MH Type 5 | 0.33 $\pm$ 0.33 c  |

|              |                    |
|--------------|--------------------|
| X-ray Type 1 | 83.00 $\pm$ 1.53 a |
| X-ray Type 2 | 8.00 $\pm$ 1.00 b  |
| X-ray Type 3 | 7.00 $\pm$ 1.15 b  |
| X-ray Type 4 | 1.00 $\pm$ 0.58 c  |
| X-ray Type 5 | 1.00 $\pm$ 0.00 c  |
