# Supplementary material for: Detecting Brachypodium distachyon Chromosomes Bd4 and Bd5 in MH- and X-Ray-Induced Micronuclei Using mcFISH
Source: MDPI journal article supplement (doi:10.3390/ijms20112848), 2019-06-11
Supplement: s1 [file s1]

TABLE S1. Characteristics of bacterial artificial chromosome (BAC) clones used for the specific painting of *Brachypodium distachyon* chromosome Bd4.

| Short (S) arm |            |          |                    |
|---------------|------------|----------|--------------------|
| Clone name    | Start (bp) | End (bp) | Repeat content (%) |
| b0022F16      | 1375208    | 1513070  | 17.05              |
| a0029D03      | 1509327    | 1527857  | 14.80              |
| b0011J07      | 1877049    | 2006504  | 13.50              |
| b0030B12      | 2007584    | 2157984  | 7.19               |
| a0008M09      | 3005577    | 3057490  | 10.02              |
| b0031P08      | 4003479    | 4005284  | 0.00               |
| b0020L19      | 4509871    | 4652127  | 17.87              |
| b0015K04      | 5000667    | 5192928  | 12.52              |
| b0015K04      | 5192351    | 5334608  | 20.17              |
| a0021K11      | 5356098    | 5506730  | 12.85              |
| b0040J03      | 7830905    | 8001843  | 19.13              |
| b0021B09      | 9502901    | 9667864  | 12.35              |
| a0039N16      | 9858184    | 10002657 | 14.32              |
| a0043D11      | 11006774   | 11150531 | 22.28              |
| a0038M23      | 13356537   | 13506604 | 23.57              |
| a0004L13      | 13506625   | 13718798 | 11.46              |
| a0010I18      | 14002249   | 14164264 | 10.04              |
| a0028M13      | 14467770   | 14501426 | 10.11              |
| a0006A19      | 15500025   | 15633790 | 10.64              |
| b0023J07      | 18378813   | 18509732 | 28.56              |

| Long (L) arm |            |          |                    |
|--------------|------------|----------|--------------------|
| Clone name   | Start (bp) | End (bp) | Repeat content (%) |
| a0047K04     | 27639991   | 27795427 | 18.44              |
| b0012C05     | 28999425   | 29071930 | 12.74              |

| Clone name | Start (bp) | End (bp) | Repeat<br>content (%) |
|------------|------------|----------|-----------------------|
| a0006J17   | 29358544   | 29516826 | 9.42                  |
| b0027J13   | 30855184   | 31004161 | 28.40                 |
| a0013N14   | 31000455   | 31132079 | 9.47                  |
| a0020D08   | 32504625   | 32642850 | 8.94                  |
| b0033J04   | 32835278   | 33001029 | 24.02                 |
| a0029H13   | 33008088   | 33024284 | 20.44                 |
| b0005K02   | 33865813   | 34006488 | 20.04                 |
| b0002F10   | 34027870   | 34141505 | 10.19                 |
| a0021F10   | 35000545   | 35176627 | 26.57                 |
| a0011F18   | 36857616   | 37009036 | 26.55                 |
| a0031C04   | 37506966   | 37653676 | 24.29                 |
| a0004J07   | 38767257   | 38918272 | 6.73                  |
| b0021H03   | 38925520   | 39066237 | 14.28                 |
| b0035E05   | 39350118   | 39526113 | 6.40                  |
| b0014B09   | 39506174   | 39642910 | 17.79                 |
| a0024O22   | 39853958   | 40006315 | 16.05                 |
| b0041J05   | 40005710   | 40200691 | 17.39                 |
| a0032J21   | 40499878   | 40546546 | 5.53                  |
| a0003H15   | 40835257   | 41003446 | 12.86                 |
| b0047A04   | 41006415   | 41014781 | 22.45                 |
| a0047P14   | 41364258   | 41502074 | 13.90                 |
| a0026J09   | 41502088   | 41633709 | 24.33                 |
| b0032E02   | 41852352   | 42005820 | 21.66                 |
| b0026E20   | 42346424   | 42505268 | 15.02                 |
| b0038H23   | 42789149   | 43003220 | 6.17                  |
| b0023G20   | 43352742   | 43500050 | 9.76                  |
| b0019I11   | 43876622   | 44010479 | 6.16                  |
| a0004A24   | 44343043   | 44510220 | 7.93                  |
| a0043N14   | 45504848   | 45661980 | 6.49                  |
| b0043F05   | 46001501   | 46132046 | 15.43                 |
| a0030C04   | 46357221   | 46502222 | 7.16                  |

| Clone name | Start (bp) | End (bp) | Repeat<br>content (%) |
|------------|------------|----------|-----------------------|
| a0004O19   | 46502230   | 46658753 | 9.01                  |
| b0031I03   | 46846042   | 47008130 | 20.21                 |
| b0026N15   | 47003712   | 47134381 | 8.51                  |
| a0017H17   | 47506772   | 47643218 | 6.97                  |
| a0024E12   | 48004859   | 48154124 | 3.07                  |
| a0041I03   | 48350055   | 48507632 | 9.05                  |
