# Supplementary material for: Detecting Brachypodium distachyon Chromosomes Bd4 and Bd5 in MH- and X-Ray-Induced Micronuclei Using mcFISH
Source: MDPI journal article supplement (doi:10.3390/ijms20112848), 2019-06-11
Supplement: s1 [file s1]

TABLE S2. Characteristics of bacterial artificial chromosome (BAC) clones used for the specific painting of *Brachypodium distachyon* chromosome Bd5.

| Short (S) arm |            |          |                    |
|---------------|------------|----------|--------------------|
| Clone name    | Start (bp) | End (bp) | Repeat content (%) |
| a0018K07      | 853205     | 1009526  | 16.20              |
| a0019O20      | 1091367    | 1236179  | 16.00              |
| b0033P01      | 2501695    | 2512065  | 1.35               |
| a0009O09      | 2504345    | 2648229  | 16.66              |
| Long (L) arm  |            |          |                    |
| Clone name    | Start (bp) | End (bp) | Repeat content (%) |
| a0045F23      | 13499779   | 13653343 | 18.89              |
| b0030K21      | 15304885   | 15505515 | 22.56              |
| a0026M04      | 17499731   | 17633162 | 23.72              |
| a0023L21      | 17634500   | 17679830 | 4.89               |
| a0001F13      | 17802975   | 18003203 | 23.52              |
| a0017D24      | 18003221   | 18155770 | 16.96              |
| b0042J14      | 18312982   | 18503857 | 19.62              |
| a0046O09      | 20358624   | 20503060 | 24.99              |
| b0024J19      | 20845837   | 21003148 | 11.02              |
| b0033K07      | 21003184   | 21110356 | 11.50              |
| b0037B05      | 21507488   | 21710347 | 23.77              |
| b0016H11      | 21877774   | 22006306 | 16.69              |
| b0041K21      | 23480858   | 23500119 | 1.39               |
| b0032J06      | 23870997   | 24003288 | 6.19               |
| a0045J11      | 24003128   | 24154997 | 9.30               |
| a0026B16      | 24841254   | 25002060 | 5.96               |

| Clone name | Start (bp) | End (bp) | Repeat<br>content (%) |
|------------|------------|----------|-----------------------|
| a0031B15   | 25503136   | 25695070 | 4.94                  |
| a0023B07   | 25746075   | 25906029 | 8.99                  |
| a0019J13   | 25906054   | 26098440 | 3.35                  |
