# Supplementary material for: Detecting Brachypodium distachyon Chromosomes Bd4 and Bd5 in MH- and X-Ray-Induced Micronuclei Using mcFISH
Source: Int J Mol Sci. 2019 Jun 11;20(11):2848. doi: 10.3390/ijms20112848 (PMC6612364; doi:10.3390/ijms20112848)
Supplement: Supplementary file 1 [file ijms-20-02848-s001.ZIP]

Archive with 4 entries (4 files):
- ijms-490628-Table S1.pdf
- ijms-490628-Table S2.pdf
- ijms-490628-Table S3.pdf
- ijms-490628-Table S4.pdf
